# Supplementary material for: Combined Effect of Nonalcoholic Fatty Liver Disease and Impaired Fasting Glucose on the Development of Type 2 Diabetes: A 4-year retrospective longitudinal study
Source: PubMed Central journal article supplement — Diabetes Care. 2011 Feb 17;34(3):727–9. doi: 10.2337/dc10-1991 (PMC3041216; doi:10.2337/dc10-1991), 2011-02-17
Supplement: supp_dc10-1991v101991_DC101991SupplementaryData.pdf [file supp_dc10-1991v101991_DC101991SupplementaryData.pdf]

SUPPLEMENTARY DATA

**Supplementary Table 1. Baseline characteristics of study subjects.**

|                          | Subjects (n=7849) |
|--------------------------|-------------------|
| Male (%)                 | 5409 (68.9)       |
| Age (years)              | 44.5±5.4          |
| HbA1c (%)                | 5.39±0.33         |
| Fasting glucose (mg/dl)  | 95.0±8.4          |
| AST (IU)                 | 23.2±8.9          |
| ALT (IU)                 | 24.9±15.8         |
| BMI (kg/m <sup>2</sup> ) | 23.6±2.8          |
| Systolic BP (mmHg)       | 112.7±14.5        |
| HDL-C (mg/dl)            | 51.8±11.7         |
| Triglycerides (mg/dl)    | 131.6±81.5        |
| LDL-C (mg/dl)            | 112.5±26.8        |
| Fasting insulin (μIU)    | 8.5±3.2           |
| HOMA IR                  | 2.01±0.82         |
| Physical activity (%)*   | 1505 (19.2)       |
| Smoking status (%)       |                   |
| Current                  | 1705 (21.7)       |
| Former                   | 1666 (21.2)       |
| Current drinker (%)      | 4942 (63.0)       |

NOTE. Data are n (%) or mean ± standard deviation

\*Physical activity denotes engagement in physical activity for a minimum of 30 minutes at least three times per week

Abbreviations: AST, aspartate aminotransferase; ALT, alanine aminotransferase; BMI, body mass index; BP, blood pressure; HDL-C, high density lipoprotein cholesterol; LDL-C, low density lipoprotein cholesterol; HOMA-IR, homeostasis model assessment of insulin resistance

SUPPLEMENTARY DATA

**Supplementary Table 2. Hazard ratios for developing type 2 diabetes according to the presence of NAFLD at baseline.**

| Variable                                                                 | non-NAFLD   | NAFLD       | <i>p</i> value |
|--------------------------------------------------------------------------|-------------|-------------|----------------|
| No. of subjects                                                          | 5557        | 2292        |                |
| No. of subjects who developed diabetes                                   | 208         | 227         |                |
| Proportion of subjects who developed diabetes (%)                        | 3.7         | 9.9         |                |
| Person-years of follow-up                                                | 22,009      | 8,928       |                |
| No. of incident case of diabetes (per 100 person-years)                  | 0.9         | 2.5         |                |
|                                                                          |             |             |                |
| Adjusted hazard ratio (95% CI)*                                          |             |             |                |
| Age and gender                                                           | 1           | 2.46        | <0.001         |
|                                                                          | (reference) | (2.02-3.00) |                |
| Age, gender, BMI, TG, HDL-C, systolic BP, and concurrent presence of IFG | 1           | 1.34        | 0.011          |
|                                                                          | (reference) | (1.07-1.67) |                |
| Multivariate <sup>†</sup>                                                | 1           | 1.33        | 0.010          |
|                                                                          | (reference) | (1.07-1.66) |                |
|                                                                          |             |             |                |

\* estimated from Cox proportional hazard analysis.

† The multivariate Cox regression model was adjusted for baseline age, gender, BMI, TG, HDL-C, systolic BP, concurrent presence of IFG, smoking status (never smoked, former smoker or current smoker), physical activity ( a minimum of 30 minutes at least 3 times per week or less), and alcohol consumption (current drinker or not).

Abbreviations: NAFLD, non-alcoholic fatty liver disease; CI, confidence interval; BMI, body mass index; TG, triglycerides; HDL-C, high density lipoprotein cholesterol; BP, blood pressure.

SUPPLEMENTARY DATA

**Supplementary Table 3. Baseline characteristics of study subjects by presence of NAFLD and IFG.**

|                                     | NFG(n=5800) |                         |                     | P | IFG(n=2049) |             |                     |
|-------------------------------------|-------------|-------------------------|---------------------|---|-------------|-------------|---------------------|
|                                     | non NAFLD   | NAFLD                   |                     |   | non NAFLD   | NAFLD       | P                   |
| n (%)                               | 4353 (75.1) | 1447 (24.9)             |                     |   | 1204 (58.8) | 845 (41.2)  |                     |
| Male (%)                            | 2486 (57.1) | 1289 (89.1)             |                     |   | 868 (72.1)  | 766 (90.7)  |                     |
| Age (years)                         | 44.2±5.4    | 44.4±4.8 <sup>†</sup>   | 0.15 *              |   | 45.6±5.9    | 45.4±5.1    | 0.404 *             |
| HbA1c (%)                           | 5.33±0.30   | 5.36±0.32 <sup>†</sup>  | <0.001 *            |   | 5.46±0.33   | 5.58±0.36   | <0.001 *            |
| Fasting glucose (mg/dl)             | 90.6±5.3    | 92.6±4.7 <sup>†</sup>   | <0.001 *            |   | 105.4±5.2   | 106.6±6.0   | <0.001 *            |
| AST (IU)                            | 21.6±6.7    | 26.6±13.3 <sup>†</sup>  | <0.001 *            |   | 22.2±6.6    | 27.3±9.4    | <0.001 *            |
| ALT (IU)                            | 19.8±10.7   | 35.1±20.1 <sup>†</sup>  | <0.001 *            |   | 22.1±10.8   | 37.4±20.0   | <0.001 *            |
| BMI(kg/m <sup>2</sup> )             | 22.5±2.4    | 25.6±2.4 <sup>†</sup>   | <0.001 *            |   | 23.6±2.4    | 26.1±2.4    | <0.001 *            |
| Systolic BP (mmHg)                  | 109.6±13.5  | 115.8±13.9              | <0.001 *            |   | 115.9±15.2  | 118.8±14.9  | <0.001 *            |
| HDL-C (mg/dl)                       | 54.3±12.0   | 46.4±8.7 <sup>†</sup>   | <0.001 *            |   | 53.4±12.1   | 46.2±8.0    | <0.001 *            |
| Triglycerides (mg/dl)               | 107.0±57.1  | 177.2±93.3 <sup>†</sup> | <0.001 *            |   | 125.9±75.7  | 188.2±109.4 | <0.001 *            |
| LDL-C (mg/dl)                       | 107.9±25.8  | 120.4±26.8 <sup>†</sup> | <0.001 *            |   | 112.3±26.0  | 122.2±27.6  | <0.001 *            |
| Fasting insulin (μIU)               | 7.5±2.6     | 9.9±3.2 <sup>†</sup>    | <0.001 *            |   | 8.4±2.8     | 10.9±3.8    | <0.001 *            |
| HOMA IR                             | 1.70±0.60   | 2.28±0.76 <sup>‡</sup>  | <0.001 *            |   | 2.20±0.76   | 2.89±1.05   | <0.001 *            |
| Physical activity (%) <sup>  </sup> | 853 (19.5)  | 216 (14.9) <sup>¶</sup> | <0.001 <sup>§</sup> |   | 298 (24.8)  | 138 (16.3)  | <0.001 <sup>§</sup> |
| Smoking status (%)                  |             |                         |                     |   |             |             |                     |
| Current                             | 763 (17.7)  | 437 (30.3) <sup>¶</sup> | <0.001 <sup>§</sup> |   | 261 (21.8)  | 244 (28.9)  | <0.001 <sup>§</sup> |
| Former                              | 770 (17.8)  | 414 (28.7) <sup>¶</sup> | <0.001 <sup>§</sup> |   | 246 (20.5)  | 236 (28.0)  | <0.001 <sup>§</sup> |
| Current drinker (%)                 | 2579 (59.2) | 981 (67.9)              | <0.001 <sup>§</sup> |   | 809 (67.2)  | 573 (67.8)  | 0.481 <sup>§</sup>  |

NOTE. Data are n (%) or mean ± standard deviation

\* by unpaired t-test.

§ by Pearson's Chi square

† P < 0.001 vs. with non-NAFLD group in the IFG subjects by unpaired t-test.

‡ P = 0.011 vs. with non-NAFLD group in the IFG subjects by unpaired t-test.

¶ P < 0.001 vs. with non-NAFLD group in the IFG subjects by Pearson's Chi square

// Physical activity denotes engagement in physical activity for a minimum of 30 minutes at least three times per week

Abbreviations: NAFLD, non-alcoholic fatty liver disease; NFG, normal fasting glucose; IFG, impaired fasting glucose; AST, aspartate aminotransferase; ALT, alanine aminotransferase; BMI, body mass index; BP, blood pressure; HDL-C, high density lipoprotein cholesterol; LDL-C, low density lipoprotein cholesterol; HOMA-IR, homeostasis model assessment of insulin resistance.

SUPPLEMENTARY DATA

**Supplementary Figure 1. Kaplan-Meier estimates for the percentage of subjects who developed diabetes during the follow-up period based on the presence of IFG and NAFLD.**

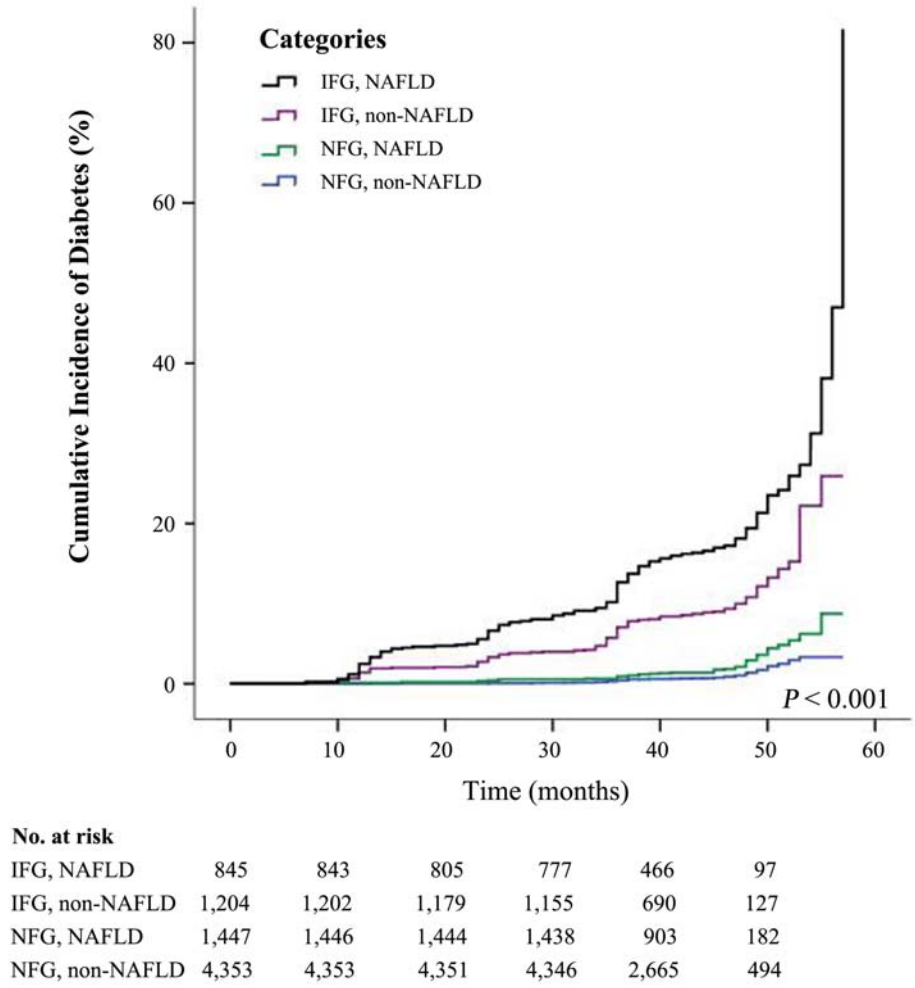

The difference between the four groups was significant ( $P < 0.001$  by the log-rank test).
